# Supplementary material
Source: HighWire-hosted journal article supplement (https://cmaj.ca/highwire/filestream/59816/field_highwire_adjunct_files/0/160050-infographic.pdf)
Supplement: 160050-infographic.pdf [file 160050-infographic.pdf]

# Resting heart rate & disease

High resting heart rate  
is associated with:

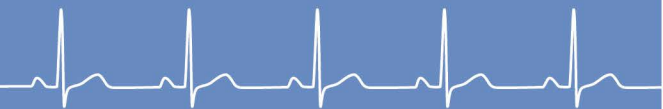

- Increased inflammatory markers
- Cardiovascular disease & mortality
- Functional decline

**Every extra 10 beats**  
above 60 beats per minute increases risk by about:

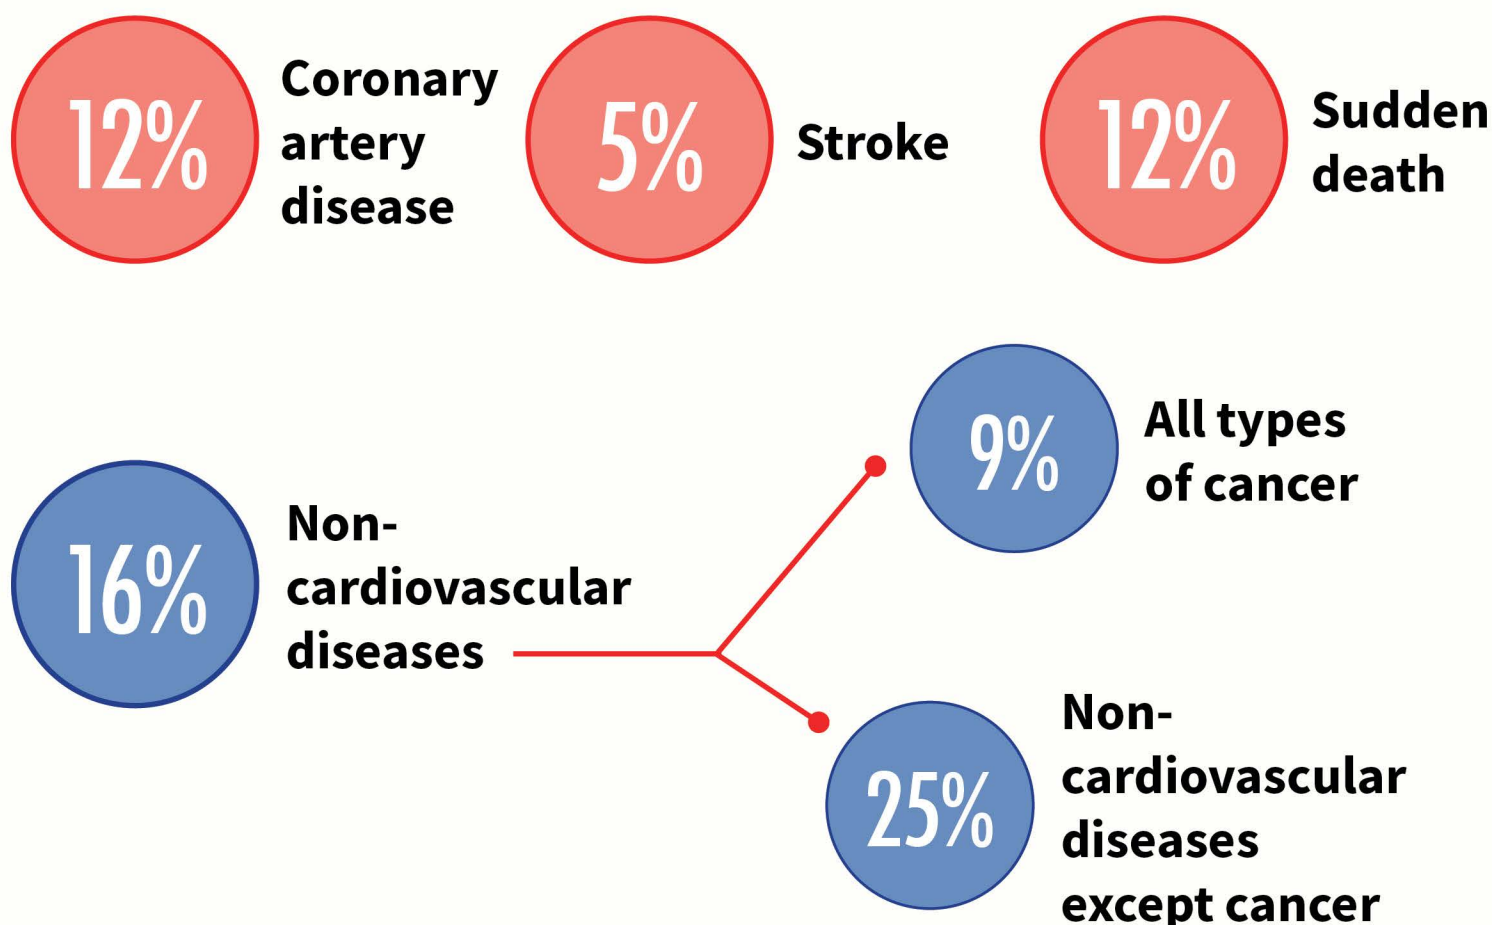

In a general population,  
**a slower natural heart rate is related to better health.**
